# Supplementary material
Source: ML conference proceedings conference paper supplement (https://www.ecva.net/papers/eccv_2020/papers_ECCV/html/123490052_ECCV_2020_paper.php)
Supplement: Supplementary file 1 [file 123490052-supp.pdf]

## A Image Generation with SNGAN

We have demonstrated the effectiveness of GS in compressing image-to-image GANs (*e.g.*, CycleGAN [67], StyleGAN [50]) in the main text. Here we show GS is also generally applicable to noise-to-image GANs (*e.g.*, SNGAN [44]). SNGAN with the ResNet backbone is one of the most popular noise-to-image GANs, with state-of-the-art performance on a few datasets such as CIFAR10 [33]. The generator in SNGAN has 7 convolution layers with 1.57 GFLOPs, with  $32 \times 32$  image outputs. We evaluate SNGAN generator compression on the CIFAR-10 dataset. Inception Score (IS) [49] is used to measure image generation and style transfer quality. We use latency (FLOPs) and model size to evaluate the network efficiency. Quantative and visualization results are shown in Table 3 and Figure 6 respectively. GS is able to compress SNGAN by up to  $8\times$  (in terms of model size), with minimum drop in both visual quality and the quantitative IS value of generated images.

Table 3: SNGAN compression results.

| Method   | MFLOPs  | Model Size (MB) | IS   |
|----------|---------|-----------------|------|
| Original | 1602.75 | 16.28           | 8.27 |
| GS-32    | 1108.78 | 12.88           | 8.01 |
|          | 509.39  | 8.32            | 7.65 |
| GS-8     | 1115.11 | 3.24            | 8.14 |
|          | 510.33  | 2.01            | 7.62 |

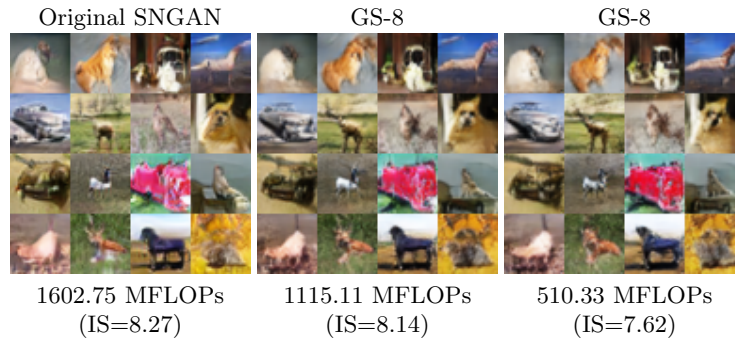

Fig. 6: CIFAR-10 images generation by SNGAN (original and compressed). Left-most column: images generated by original SNGAN. The rest columns: images generated by GS-8 compressed SNGAN, with different compression ratios. Images are randomly selected instead of cherry-picked.
